# Supplementary material
Source: publisher site journal article supplement (https://www.spandidos-publications.com/5684/downloadSupplementary)
Supplement: Supplementary file 1 [file downloadSupplementary]

## Sheet: Sheet1
Table SIV. The highest correlation coefficient is found between MBNL1-AS1 expression and BVES expression in CRC tissues.
Gene1	biotype	style	Gene2	biotype_1	style_1	interaction	Type	Abs_Value
BVES	protein_coding	down	MBNL1-AS1	lincRNA	down	0.945894	1	0.945894
CHRM2	protein_coding	down	MBNL1-AS1	lincRNA	down	0.922349	1	0.922349
ATP2B4	protein_coding	down	MBNL1-AS1	lincRNA	down	0.920604	1	0.920604
CFL2	protein_coding	down	MBNL1-AS1	lincRNA	down	0.91955	1	0.91955
KCNMA1	protein_coding	down	MBNL1-AS1	lincRNA	down	0.914532	1	0.914532
MAB21L2	protein_coding	down	MBNL1-AS1	lincRNA	down	0.910788	1	0.910788
CALD1	protein_coding	down	MBNL1-AS1	lincRNA	down	0.906259	1	0.906259
DIXDC1	protein_coding	down	MBNL1-AS1	lincRNA	down	0.90326	1	0.90326
HSPB8	protein_coding	down	MBNL1-AS1	lincRNA	down	0.90275	1	0.90275
LDB3	protein_coding	down	MBNL1-AS1	lincRNA	down	0.901177	1	0.901177
LMO3	protein_coding	down	MBNL1-AS1	lincRNA	down	0.900668	1	0.900668
ANGPTL1	protein_coding	down	MBNL1-AS1	lincRNA	down	0.899087	1	0.899087
DNAJB5	protein_coding	down	MBNL1-AS1	lincRNA	down	0.898318	1	0.898318
DES	protein_coding	down	MBNL1-AS1	lincRNA	down	0.890322	1	0.890322
DACT3	protein_coding	down	MBNL1-AS1	lincRNA	down	0.888781	1	0.888781
CPEB1	protein_coding	down	MBNL1-AS1	lincRNA	down	0.885524	1	0.885524
FERMT2	protein_coding	down	MBNL1-AS1	lincRNA	down	0.883265	1	0.883265
GPM6A	protein_coding	down	MBNL1-AS1	lincRNA	down	0.880504	1	0.880504
FAM129A	protein_coding	down	MBNL1-AS1	lincRNA	down	0.879185	1	0.879185
AKAP6	protein_coding	down	MBNL1-AS1	lincRNA	down	0.87874	1	0.87874
ADAMTSL3	protein_coding	down	MBNL1-AS1	lincRNA	down	0.877286	1	0.877286
GNAO1	protein_coding	down	MBNL1-AS1	lincRNA	down	0.87718	1	0.87718
KANK2	protein_coding	down	MBNL1-AS1	lincRNA	down	0.871607	1	0.871607
EML1	protein_coding	down	MBNL1-AS1	lincRNA	down	0.870973	1	0.870973
ANK2	protein_coding	down	MBNL1-AS1	lincRNA	down	0.860202	1	0.860202
ANKS1B	protein_coding	down	MBNL1-AS1	lincRNA	down	0.860005	1	0.860005
MAPK4	protein_coding	down	MBNL1-AS1	lincRNA	down	0.857253	1	0.857253
DMD	protein_coding	down	MBNL1-AS1	lincRNA	down	0.85516	1	0.85516
KCNN3	protein_coding	down	MBNL1-AS1	lincRNA	down	0.853868	1	0.853868
LONRF2	protein_coding	down	MBNL1-AS1	lincRNA	down	0.853588	1	0.853588
ATP1A2	protein_coding	down	MBNL1-AS1	lincRNA	down	0.851262	1	0.851262
